# Supplementary material for: Association between Organizational Support and Turnover Intention in Nurses: A Systematic Review and Meta-Analysis
Source: MDPI journal article supplement (doi:10.3390/healthcare12030291), 2024-01-23
Supplement: s1 [file s1]

**Supplementary Table S1.** Quality of studies included in the systematic review.

|                                                                             | (Sheng et al., 2023) | (Brunetto et al., 2016) | (Abou Hashish, 2017) | (Shacklock et al., 2014) | (Liu et al., 2018) | (Filipova, 2011) | (Bobbio & Manganelli, 2015) | (Galletta et al., 2011) |
|-----------------------------------------------------------------------------|----------------------|-------------------------|----------------------|--------------------------|--------------------|------------------|-----------------------------|-------------------------|
| 1. Were the criteria for inclusion in the sample clearly defined?           | √                    | √                       | √                    | √                        | √                  | √                | √                           | √                       |
| 2. Were the study subjects and the setting described in detail?             | √                    | √                       | √                    | √                        | √                  | √                | √                           | √                       |
| 3. Was the exposure measured in a valid and reliable way?                   | √                    | √                       | √                    | √                        | √                  | √                | √                           | √                       |
| 4. Were objective, standard criteria used for measurement of the condition? | √                    | √                       | √                    | √                        | √                  | √                | √                           | √                       |
| 5. Were confounding factors identified?                                     |                      |                         | √                    |                          | √                  | √                |                             |                         |
| 6. Were strategies to deal with confounding factors stated?                 |                      |                         | √                    |                          | √                  | √                |                             |                         |

|                                                            |          |          |      |          |      |      |          |          |
|------------------------------------------------------------|----------|----------|------|----------|------|------|----------|----------|
| 7. Were the outcomes measured in a valid and reliable way? | √        | √        | √    | √        | √    | √    | √        | √        |
| 8. Was appropriate statistical analysis used?              | √        | √        | √    | √        | √    | √    | √        | √        |
| <b>Total quality</b>                                       | Moderate | Moderate | Good | Moderate | Good | Good | Moderate | Moderate |
